# Supplementary material for: Screen-printed wearable sensors for continuous respiratory rate monitoring: fabrication, clinical evaluation, and point-of-care potential
Source: Royal Society of Chemistry journal article supplement (doi:10.1039/d4ma00510d), 2024-01-01
Supplement: d4ma00510d1.zip [file d4ma00510d1.zip]

Jordan University Hospital

Ref: 10-2021-4348

Date: 23/02/2021

Prof. Dr. Mahmoud Abu-Abeeleh  
University of Jordan/ School of Medicine

Greetings,

The Institutional Review Board (IRB) discussed your research, entitled [Validation and Evaluation of Stretchable and Wearable Screen Printed Strain Gauge Sensor for Respiratory Rate and Heart Rate Monitoring on Health and Non-Healthy People in Different Positions], in its session No. 3/2021 on 16/02/2021

The Committee shall recommend the following after deliberation:

**Resolution No. (64/2021):**

To approve conducting the above research, provided the following:

- Adherence to the hospital's drug study policy (Adm po21/3, Adm p032/1).
- To preserve the confidentiality of the information and to use it only for the submitted research
- The committee has the right to request the declaration of informed consent from researchers at any time, to review these declarations, and to preserve them in the study file for two years from the approval date by the committee.
- This approval is valid for one year from the date of the resolution's issuance.
- Prior coordination with the Scientific Research Office is required in conducting the research.
- Providing the Scientific Research Office with the results of the study.

Yours Sincerely,

Chairperson of the Institutional Review Board (IRB)

Prof. Dr. Shawqi Saleh [Signature]

Cc:

Dr. Director of Scientific Research Office  
Department/ Relevant Department

Tel: 5353444 – Fax: 5353388 – P. O. Box 13046 – Amman – Jordan

I, the undersigned, certify that I am fluent in  
..... and ..... Languages, that I am  
competent to perform the translation and that  
the above translation is the complete and  
accurate translation of the document entitled  
hereinabove. I assume no responsibility for  
the contents

Signature

Date: 19/5/2021  
Doc #:



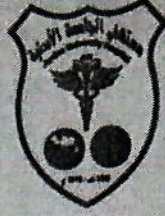

Ref. 10-2021-4348

Date: 23-2-2021

الرقم: \_\_\_\_\_

التاريخ: \_\_\_\_\_

الأستاذ الدكتور محمود ابو عبيد  
الجامعة الأردنية / كلية الطب

تحية طيبة وبعد ،،

ناقشت اللجنة المؤسسية لمراجعة البحوث والدراسات الدوائية (IRB) بجلستها رقم (2021/3) بتاريخ 2021/2/16، بحكم بعنوان:

Validation and Evaluation of Stretchable and Wearable Screen Printed Strain Gauge Sensor for Respiratory Rate and Heart rate Monitoring on Healthy and Non-Healthy People in different positions

وبعد المداولة توصي اللجنة ما يلي:

القرار رقم ( 64 / 2021 ) :

الموافقة على إجراء البحث المذكور أعلاه ، شريطة ما يلي :

- الالتزام بميثاقية الدراسات الدوائية في المستشفى (Adm po21/3, Adm p032/1).
- الحفاظ على سرية المعلومات وأن لا تستخدم إلا لغايات البحث المقدم.
- بحق للجنة طلب إقرار الموافقات المستتيرة من الباحثين في أي وقت والاطلاع عليها وكذلك يجب الاحتفاظ بها في ملف الدراسة لمدة عامين من تاريخ الموافقة عليها من قبل اللجنة.
- تعتبر هذه الموافقة سارية المفعول لمدة عام من تاريخ صدور القرار.
- تزويد اللجنة بتقرير عن الدراسة بعد ستة أشهر من تاريخ صدور الموافقة.
- التمسك بالمسبق مع مكتب البحث العلمي في اجراء البحث.
- تزويد مكتب البحث العلمي بنتائج الدراسة.

وتفضلوا بقبول فائق الاحترام،،،

رئيس اللجنة المؤسسية لمراجعة

البحوث والدراسات الدوائية (IRB)

الأستاذ الدكتور شوقي صالح

نسخة لـ:

- د. مدير مكتب البحث العلمي

- د. مدير / قسم البحث
